# Supplementary material for: Prognostic Factors of Long-Term Outcomes after Primary Chemo-Radiotherapy in Non-Metastatic Anal Squamous Cell Carcinoma: An International Bicentric Cohort
Source: MDPI journal article supplement (doi:10.3390/biomedicines11030791), 2023-03-06
Supplement: s1 [file s1]

## *Supplementary Material*

### Prognostic Factors of Long-Term Outcomes After Primary Chemo-Radiotherapy in Non-Metastatic Anal Squamous Cell Carcinoma: An International Multicenter Cohort.

**Supplementary Table S1:** Univariate analysis Complete Response based on patient demographic and clinical characteristics

| Patient characteristics | All<br>n=176 (%) | Complete<br>Response<br>n=123 (%) | Non-complete<br>Response<br>n=53 (%) | x2    | p-value     |
|-------------------------|------------------|-----------------------------------|--------------------------------------|-------|-------------|
| Gender                  |                  |                                   |                                      |       |             |
| Male                    | 57 (32)          | 36 (29)                           | 21 (40)                              | 1.81  | 0.17        |
| Female                  | 119 (68)         | 87 (71)                           | 32 (60)                              |       |             |
| Tumor                   |                  |                                   |                                      |       |             |
| T1-T2                   | 76 (43)          | 59 (48)                           | 17 (32)                              | 3.81  | <b>0.05</b> |
| T3-T4                   | 100 (57)         | 64 (52)                           | 36 (67)                              |       |             |
| Nodes                   |                  |                                   |                                      |       |             |
| Negative                | 81 (46)          | 64 (52)                           | 17 (32)                              | 5.93  | <b>0.01</b> |
| Positive                | 95 (54)          | 59 (48)                           | 36 (68)                              |       |             |
| HIV                     |                  |                                   |                                      |       |             |
| Negative                | 138 (78)         | 100 (81)                          | 38 (72)                              | 2.02  | 0.15        |
| Positive                | 38 (22)          | 23 (19)                           | 15 (28)                              |       |             |
| HPV                     |                  |                                   |                                      |       |             |
| Negative                | 12 (7)           | 7 (6)                             | 5 (9)                                | 0.82  | 0.37        |
| Positive                | 164 (93)         | 116 (94)                          | 48 (91)                              |       |             |
| HIV-HPV infection       |                  |                                   |                                      |       |             |
| HIV- and HPV-           | 10 (6)           | 5 (4)                             | 5 (10)                               | *3.42 | *0.06       |
| *HIV- and HPV+          | 128 (73)         | 95 (77)                           | 33 (62)                              |       |             |
| HIV+ and HPV-           | 2 (1)            | 2 (2)                             | 0                                    |       |             |
| *HIV+ and HPV+          | 36 (20)          | 21 (17)                           | 15 (28)                              |       |             |
| Differentiation         |                  |                                   |                                      |       |             |
| Well                    | 29 (16)          | 22 (18)                           | 7 (15)                               | 1.45  | 0.48        |
| Moderate                | 86 (49)          | 60 (49)                           | 26 (54)                              |       |             |
| Poorly                  | 40 (23)          | 25 (20)                           | 15 (31)                              |       |             |
| Unknown                 | 21 (12)          | 16 (13)                           | 5 (31)                               |       |             |

**x2:** Pearson's Chi-squared test

\* Statistically significant differences among treatments (p<0.05).

**Supplementary Table S2:** Univariate analysis Overall Survival based on patient demographics, clinical and treatment characteristics

| <b>Patient characteristics</b> | <b>All</b><br>n=175 (%) | <b>No death</b><br>n=143 (%) | <b>Death</b><br>n=32 (%) | <b>x2</b> | <b>p-value</b> |
|--------------------------------|-------------------------|------------------------------|--------------------------|-----------|----------------|
| Gender                         |                         |                              |                          |           |                |
| Male                           | 57 (33)                 | 42 (29)                      | 15 (47)                  | 3.64      | <b>0.05</b>    |
| Female                         | 118 (67)                | 101 (71)                     | 17 (53)                  |           |                |
| Tumor                          |                         |                              |                          |           |                |
| T1-T2                          | 76 (43)                 | 68 (48)                      | 8 (25)                   | 5.41      | <b>0.02</b>    |
| T3-T4                          | 99 (57)                 | 75 (52)                      | 24 (75)                  |           |                |
| Nodes                          |                         |                              |                          |           |                |
| Negative                       | 80 (46)                 | 69 (48)                      | 11 (34)                  | 2.02      | 0.15           |
| Positive                       | 95 (54)                 | 74 (52)                      | 21 (66)                  |           |                |
| HIV                            |                         |                              |                          |           |                |
| Negative                       | 137 (78)                | 114 (80)                     | 23 (72)                  | 0.94      | 0.33           |
| Positive                       | 38 (22)                 | 29 (20)                      | 9 (28)                   |           |                |
| HPV                            |                         |                              |                          |           |                |
| Negative                       | 11 (6)                  | 9 (6)                        | 2 (6)                    | 0.00      | 0.99           |
| Positive                       | 164 (94)                | 134 (94)                     | 30 (94)                  |           |                |
| HIV-HPV infection              |                         |                              |                          |           |                |
| HIV- and HPV-                  | 9 (5)                   | 7 (5)                        | 2 (6)                    | *1.38     | *0.24          |
| *HIV- and HPV+                 | 128 (73)                | 107 (75)                     | 21 (66)                  |           |                |
| HIV+ and HPV-                  | 2 (1)                   | 2 (1)                        | 0                        |           |                |
| *HIV+ and HPV+                 | 36 (21)                 | 27 (19)                      | 9 (28)                   |           |                |
| Differentiation                |                         |                              |                          |           |                |
| Well                           | 28 (16)                 | 25 (17)                      | 3 (10)                   | 11.3      | <b>0.003</b>   |
| Moderate                       | 86 (49)                 | 74 (53)                      | 12 (37)                  |           |                |
| Poorly                         | 40 (23)                 | 25 (17)                      | 15 (47)                  |           |                |
| Unknown                        | 21 (12)                 | 19 (13)                      | 2 (6)                    |           |                |

**x2:** Pearson's Chi-squared test

\* Statistically significant differences among treatments (p<0.05).

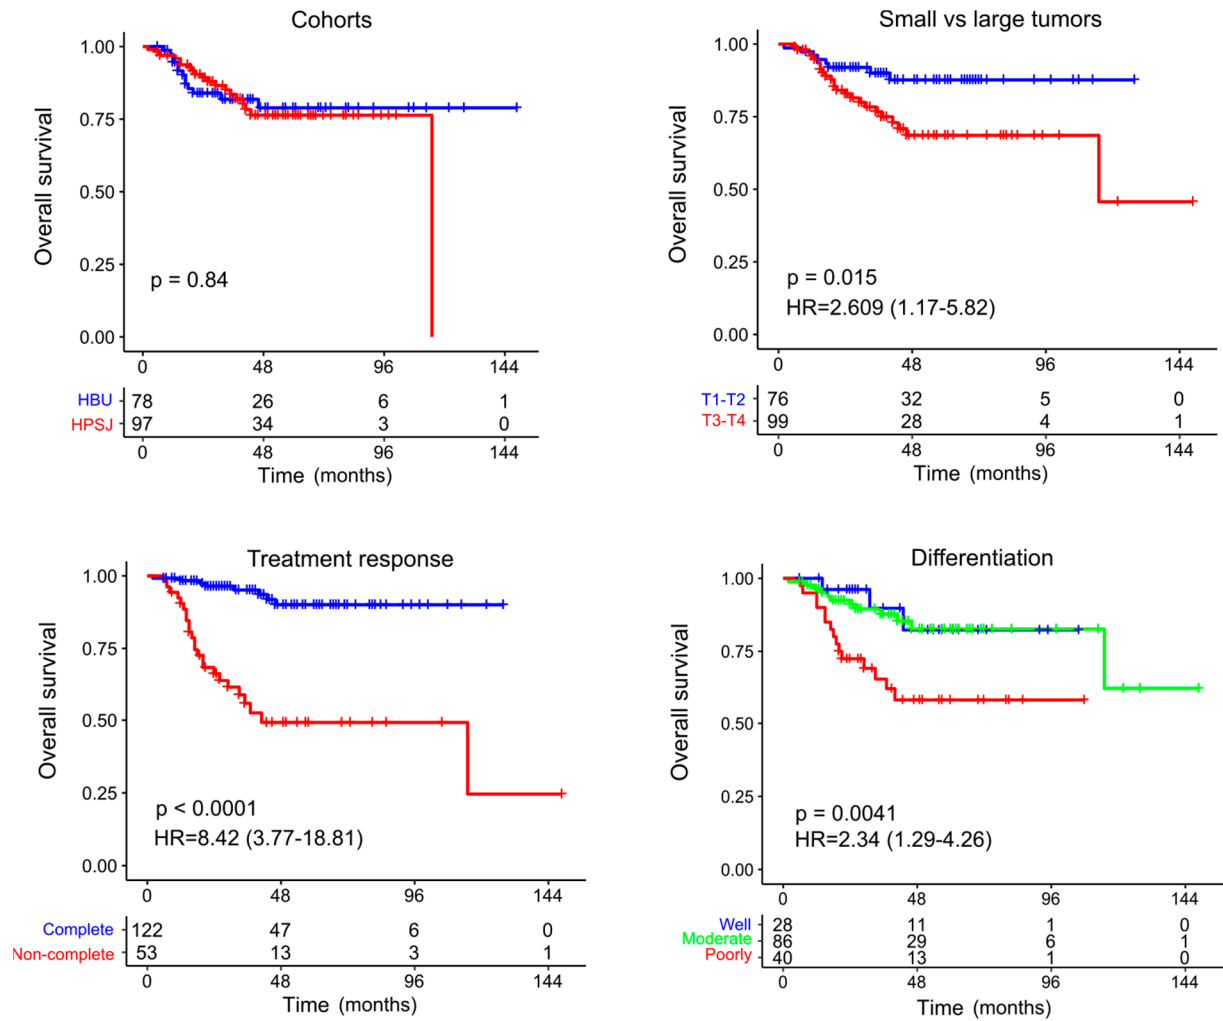

**Supplementary Figure S1.** Overall Survival Kaplan–Meier survival analysis and Cox regression analysis of NM-ASCC patients according to clinicopathological features.
